# Supplementary material for: The Association between the Dietary Inflammatory Index and Thyroid Function in U.S. Adult Males
Source: MDPI journal article supplement (doi:10.3390/nu13103330), 2021-09-23
Supplement: s1 [file s1]

## Supplementary material Table S2

### The methodology of dietary inflammatory index calculation

Dietary inflammatory index (DII) was a literature-derived and population-based tool to assess dietary inflammatory potential via 24-h dietary recall. DII reflected both a robust literature base and standardization of individual intakes to global referent values, where 45 food parameters from 11 food consumption data sets were identified and assessed their impacts on six inflammatory markers. A total of 1943 qualified articles were screened and scored based on these 45 food parameters. If food parameters were identified to increase pro-inflammatory cytokines (TNF- $\alpha$ , IL-1 $\beta$ , IL-6, and CRP) or decrease anti-inflammatory cytokines (IL-4 and IL-10), the study was scored “+1”, vice versa. Null scores were set to “0”, and these values were weighted according to study design. A Z-score was generated by subtracting the “standard mean” from the amount reported and dividing this value by its standard deviation (SD). To minimize the effect of “right skewing”, Z-score was converted to a percentile score. A symmetrical distribution with values centered on 0 (null) and bounded between -1 (most anti-inflammatory) and +1 (most pro-inflammatory) was achieved by doubling each percentile score and then subtracting “1”. This centered percentile value for each food parameter was then multiplied by its respective “overall inflammatory effect score” to obtain the “food parameter-specific DII score”. Lastly, all “food parameter-specific DII scores” were added together to create the ‘overall DII score’ for an individual. The “overall inflammatory effect score” of 28 food parameters incorporated in our study were presented in the table below.

| Food parameter               | Overall inflammatory effect score |
|------------------------------|-----------------------------------|
| Energy (kcal)                | 0.18                              |
| Alcohol (g)                  | -0.278                            |
| Cholesterol (mg)             | 0.11                              |
| Caffeine (g)                 | -0.11                             |
| Fat (g)                      | 0.298                             |
| Fiber (g)                    | -0.663                            |
| Folic Acid ( $\mu$ g)        | -0.19                             |
| $\beta$ -carotene ( $\mu$ g) | -0.584                            |
| Iron (mg)                    | 0.032                             |
| Magnesium (mg)               | -0.484                            |
| Zinc (mg)                    | -0.313                            |
| Selenium ( $\mu$ g)          | -0.191                            |
| Thiamin (mg)                 | -0.098                            |
| Vitamin A (RE)               | -0.401                            |
| Vitamin B 6 (mg)             | -0.365                            |
| Vitamin B 12 ( $\mu$ g)      | 0.106                             |
| Vitamin C (mg)               | -0.424                            |
| Vitamin D ( $\mu$ g)         | -0.466                            |
| Vitamin E (mg)               | -0.419                            |
| Protein (g)                  | 0.021                             |

---

|                   |        |
|-------------------|--------|
| Niacin (mg)       | -0.246 |
| Riboflavin (mg)   | -0.098 |
| Carbohydrate (g)  | 0.097  |
| MUFA (g)          | -0.009 |
| PUFA (g)          | -0.337 |
| Saturated fat (g) | 0.373  |
| (n-3) Fatty acids | -0.436 |
| (n-6) Fatty acids | -0.159 |

---
