# Supplementary material for: The Association between the Dietary Inflammatory Index and Thyroid Function in U.S. Adult Males
Source: MDPI journal article supplement (doi:10.3390/nu13103330), 2021-09-23
Supplement: s1 [file s1]

**Supplementary Table S1**

Baseline characteristics of participants based on DII tertiles, weighted.

|                                                     | Total           | DII tertile 1<br>(-4.21~1.40) | DII tertile 2<br>(-1.40~0.21) | DII tertile 3<br>(0.21~4.41) | <i>P</i> -Value |
|-----------------------------------------------------|-----------------|-------------------------------|-------------------------------|------------------------------|-----------------|
| Participant number                                  | 2346            | 782                           | 782                           | 782                          |                 |
| Mean±SD<br>age (yrs)                                | 50.74±17.68     | 49.77±17.33                   | 51.58±17.50                   | 50.87±18.19                  | 0.124           |
| Mean±SD<br>DII                                      | -0.46±1.73      | -2.31±0.63                    | -0.61±0.46                    | 1.54±0.95                    | <0.001          |
| Mean±SD<br>Energy (kcal)                            | 2401.04±1149.41 | 3111.88±1350.96               | 2361.82±818.46                | 1729.43±716.02               | <0.001          |
| Mean±SD<br>Protein intake (g)                       | 92.81±47.49     | 91.74 ± 35.14                 | 91.74±35.14                   | 64.08 ± 31.26                | <0.001          |
| Mean±SD<br>Thyroglobulin<br>antibodies (IU/mL)      | 8.90±90.91      | 8.02±94.45                    | 11.28±99.37                   | 7.39±77.54                   | 0.663           |
| Mean±SD<br>Free T3 (pg/ml)                          | 3.25±0.39       | 3.24±0.39                     | 3.24±0.39                     | 3.26±0.39                    | 0.350           |
| Mean±SD<br>Free T4 (pmol/L)                         | 10.07±1.79      | 10.05±1.87                    | 10.00±1.74                    | 10.14±1.75                   | 0.309           |
| Mean±SD<br>Thyroglobulin<br>(ug/L)                  | 14.93±52.98     | 12.96±17.55                   | 15.09 ± 49.41                 | 16.74 ± 75.31                | 0.368           |
| Mean±SD<br>TSH (mIU/L)                              | 1.97±2.02       | 1.84±1.19                     | 2.14±2.90                     | 1.92±1.53                    | 0.009           |
| Mean±SD<br>Total T4 (µg/dL)                         | 7.61±1.51       | 7.44 ± 1.47                   | 7.59±1.46                     | 7.79±1.58                    | <0.001          |
| Mean±SD<br>Total T3 (ng/dL)                         | 113.07±21.88    | 111.92±21.63                  | 112.96±21.98                  | 114.34±22.00                 | 0.090           |
| Mean±SD<br>Thyroid peroxidase<br>antibodies (IU/ml) | 11.54±67.98     | 9.13±52.73                    | 13.52±74.72                   | 11.99±74.17                  | 0.432           |
| Race/Ethnicity (%)                                  |                 |                               |                               |                              |                 |
| Mexican American                                    |                 | 17.8                          | 18.0                          | 15.0                         | <0.001          |
| Other Hispanic                                      |                 | 9.6                           | 9.2                           | 11.3                         |                 |
| Non-Hispanic White                                  |                 | 53.8                          | 51.2                          | 44.8                         |                 |
| Non-Hispanic Black                                  |                 | 13.9                          | 16.5                          | 26.2                         |                 |
| Other                                               |                 | 4.9                           | 5.1                           | 2.8                          |                 |
| Smoking status (%)                                  |                 |                               |                               |                              |                 |
| Never                                               |                 | 47.8                          | 40.4                          | 39.6                         | 0.005           |
| Former smoker                                       |                 | 28.8                          | 34.5                          | 32.9                         |                 |

|                                       |      |      |      |        |
|---------------------------------------|------|------|------|--------|
| Current smoker                        | 23.1 | 25.1 | 27.5 |        |
| Missing                               | 0.3  | 0    | 0    |        |
|                                       |      |      |      |        |
| BMI (%)                               |      |      |      |        |
| Normal (<25kg/m <sup>2</sup> )        | 30.2 | 26.3 | 25.2 | 0.061  |
| Overweight(25-29.9kg/m <sup>2</sup> ) | 37.5 | 41.0 | 37.6 |        |
| Obese (≥30kg/m <sup>2</sup> )         | 32.4 | 32.6 | 37.2 |        |
|                                       |      |      |      |        |
| UIC* (%)                              |      |      |      |        |
| Iodine deficient                      |      |      |      |        |
| (<100ug/L)                            | 25.8 | 23.3 | 26.3 | 0.579  |
| Normal (100-299ug/L)                  | 50.4 | 53.6 | 50.1 |        |
| Excessive iodine intake               | 23.8 | 23.1 | 23.5 |        |
| (≥300 ug/L)                           |      |      |      |        |
|                                       |      |      |      |        |
| Annual Family Income(%)               |      |      |      |        |
| \$ 0--\$ 4,999                        | 1.7  | 1.4  | 3.1  |        |
| \$ 5,000--\$ 9,999                    | 3.5  | 3.9  | 5.8  |        |
| \$10,000--\$14,999                    | 4.8  | 8.0  | 8.7  |        |
| \$15,000--\$19,999                    | 7.1  | 6.2  | 9.5  |        |
| \$20,000--\$24,999                    | 7.6  | 9.4  | 11.2 |        |
| \$25,000--\$34,999                    | 11.3 | 12.3 | 13.2 | <0.001 |
| \$35,000--\$44,999                    | 8.4  | 10.1 | 8.9  |        |
| \$45,000--\$54,999                    | 7.5  | 8.5  | 7.1  |        |
| \$55,000--\$64,999                    | 5.8  | 6.1  | 6.0  |        |
| \$65,000--\$74,999                    | 5.3  | 6.1  | 4.5  |        |
| \$75,000--\$99,999                    | 9.9  | 8.8  | 6.2  |        |
| \$100,000 and over                    | 19.9 | 12.5 | 8.2  |        |
| Missing & unknown                     | 2.3  | 3.0  | 3.3  |        |
|                                       |      |      |      |        |
| Education level (%)                   |      |      |      |        |
| Less than 9th grade                   | 10.1 | 12.3 | 20.5 |        |
| 9-11th grade                          | 14.2 | 16.8 | 19.6 | <0.001 |
| High school grade                     | 20.2 | 28.1 | 26.6 |        |
| Some college or AA degree             | 28.3 | 23.4 | 20.5 |        |
| College graduate or above             | 27.2 | 19.4 | 12.9 |        |
|                                       |      |      |      |        |
| Marital Status (%)                    |      |      |      |        |
| Married                               | 63.9 | 60.9 | 55.0 |        |
| Widowed                               | 4.2  | 3.1  | 5.1  |        |
| Divorced                              | 7.3  | 7.9  | 10.4 | 0.010  |
| Separated                             | 2.4  | 2.3  | 3.2  |        |
| Never married                         | 14.5 | 16.8 | 19.3 |        |
| Living with partner                   | 7.7  | 9.1  | 7.0  |        |
